# Supplementary material
Source: ML conference proceedings conference paper supplement (https://openaccess.thecvf.com/content/cvpr_2016/html/Wei_Dense_Human_Body_2016_CVPR_paper.html)
Supplement: Supplementary file 1 [file Wei_Dense_Human_Body_2016_CVPR_supplemental.zip]

Archive with 4 entries (3 files):
- comparison.pdf
- cvpr2016videoSmall.mov
- __MACOSX/
- __MACOSX/._cvpr2016videoSmall.mov
