# Supplementary material
Source: ML conference proceedings conference paper supplement (https://openaccess.thecvf.com/content/cvpr_2016/html/Wei_Dense_Human_Body_2016_CVPR_paper.html)
Supplement: Supplementary file 1 [file Wei_Dense_Human_Body_2016_CVPR_supplemental.zip › comparison.pdf]

# Dense Human Body Correspondences Using Convolutional Networks

Lingyu Wei

University of Southern California

cosimo.dw@gmail.com

Qixing Huang

Toyota Technological Institute at Chicago

huangqx@ttic.edu

Duygu Ceylan

Adobe Research

ceylan@adobe.com

Etienne Vouga

University of Texas at Austin

evouga@cs.utexas.edu

Hao Li

University of Southern California

hao@hao-li.com

## Appendix I. Comparison

We show that our deep network structure for computing dense correspondences achieves state-of-the-art performance on establishing correspondences between the intra- and inter-subject pairs from the FAUST dataset [1]. For each 3D scan in this dataset, we compute a per-vertex feature descriptor by first rendering depth maps from multiple viewpoints and averaging the per-pixel feature descriptors. Correspondences are then established by nearest neighbor search in the feature space. The accuracy of this direct method is already significantly better than all existing global shape matching methods (that do not require initial poses as input), and is comparable to the state-of-the-art non-rigid registration method proposed by Chen et al. [3], which uses the initial poses of the models to refine correspondences. To make a fair comparison with Chen et al. [3], we use an out-of-the-shelf non-rigid registration algorithm [5] to refine our results. We initialize the registration algorithm with the correspondences established with the nearest-neighbor search and refine their positions after non-rigid alignment. Results obtained with and without this refinement step are reported in Figure 1 and Table 1. It is worth mentioning that per-vertex feature descriptors for each scan are pre-computed. Thus for each pair of scans, we can obtain dense correspondences in less than a second. Though our method is designed for clothed human subjects, our algorithm is far more efficient than all other known methods which rely on local or global geometric properties.

## References

- [1] F. Bogo, J. Romero, M. Loper, and M. J. Black. FAUST: Dataset and evaluation for 3D mesh registration. In *IEEE CVPR*, 2014.
- [2] A. M. Bronstein, M. M. Bronstein, and R. Kimmel. Generalized multidimensional scaling: A framework for isometry-invariant partial surface matching. *Proc. of the National Academy of Science*, pages 1168–1172, 2006.
- [3] Q. Chen and V. Koltun. Robust nonrigid registration by convex optimization. In *IEEE ICCV*, 2015.
- [4] V. G. Kim, Y. Lipman, and T. Funkhouser. Blended Intrinsic Maps. In *ACM TOG (Siggraph)*, volume 30, 2011.
- [5] H. Li, R. W. Sumner, and M. Pauly. Global correspondence optimization for non-rigid registration of depth scans. 2008.
- [6] Y. Lipman and T. Funkhouser. Möbius voting for surface correspondence. In *ACM TOG (Siggraph)*, pages 72:1–72:12, 2009.
- [7] J. Pokrass, A. M. Bronstein, M. M. Bronstein, P. Sprechmann, and G. Sapiro. Sparse modeling of intrinsic correspondences. In *Computer Graphics Forum*, volume 32, pages 459–468. Wiley Online Library, 2013.
- [8] E. Rodola, S. Rota Bulò, T. Windheuser, M. Vestner, and D. Cremers. Dense non-rigid shape correspondence using random forests. 2014.
- [9] E. Rodola, A. Torsello, T. Harada, Y. Kuniyoshi, and D. Cremers. Elastic net constraints for shape matching. In *Proceedings of the IEEE International Conference on Computer Vision*, pages 1169–1176, 2013.
- [10] Y. Sahillioğlu and Y. Yemez. Coarse-to-fine combinatorial matching for dense isometric shape correspondence. In *Computer Graphics Forum*, volume 30, pages 1461–1470. Wiley Online Library, 2011.
- [11] Y. Sahillioğlu and Y. Yemez. Minimum-distortion isometric shape correspondence using em algorithm. *Pattern Analysis and Machine Intelligence, IEEE Transactions on*, 34(11):2203–2215, 2012.
- [12] Y. Sahillioğlu and Y. Yemez. Coarse-to-fine isometric shape correspondence by tracking symmetric flips. In *Computer Graphics Forum*, volume 32, pages 177–189. Wiley Online Library, 2013.

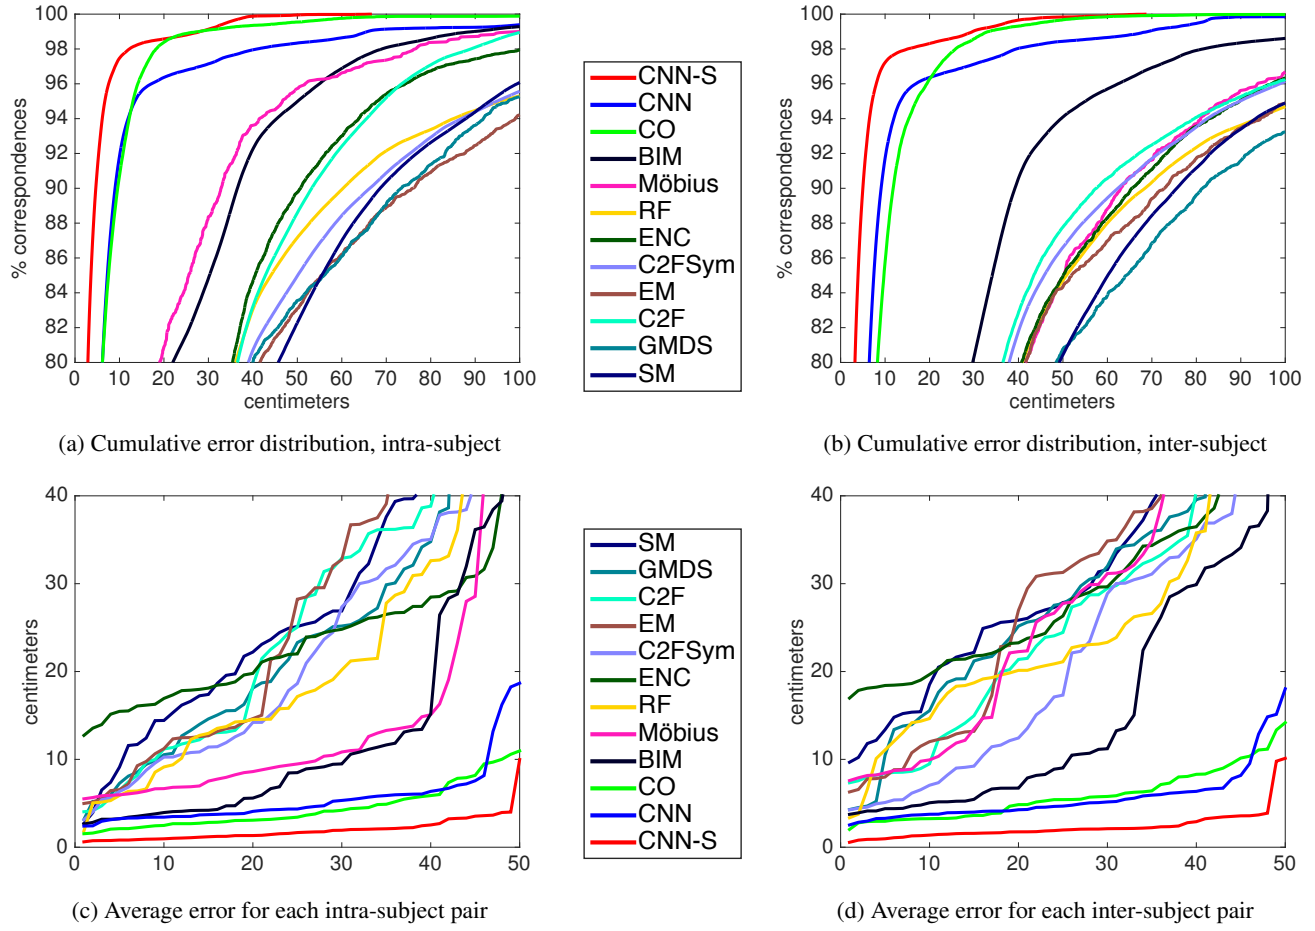

Figure 1: Evaluation on the FAUST dataset. CNN is the result obtained by performing nearest neighbor search on descriptors produced by our network. CNN-S is the result after non-rigid registration. Data for algorithms other than ours are provided by Chen et al. [3]. Left: Results for intra-subject pairs. Right: Results for inter-subject pairs. Top: Cumulative error distribution for each method, in centimeters. Bottom: Average error for each pair, sorted within each method independently.

| method     | AE (cm)     | worst AE    | 10cm-recall  |
|------------|-------------|-------------|--------------|
| CNN-S      | <b>2.00</b> | <b>9.98</b> | <b>0.975</b> |
| CNN        | 5.65        | 18.67       | 0.918        |
| CO[3]      | 4.49        | 10.96       | 0.907        |
| RF[8]      | 13.60       | 83.90       | 0.658        |
| BIM[4]     | 14.99       | 80.40       | 0.615        |
| Möbius[6]  | 22.26       | 69.26       | 0.548        |
| ENC[9]     | 23.60       | 51.32       | 0.385        |
| C2FSym[12] | 26.87       | 100.23      | 0.335        |
| EM[11]     | 30.11       | 95.42       | 0.293        |
| C2F[10]    | 23.63       | 73.89       | 0.334        |
| GMDS[2]    | 28.94       | 91.84       | 0.300        |
| SM[7]      | 28.81       | 68.42       | 0.326        |

(a) Accuracy on intra-subject pairs

| method     | AE (cm)     | worst AE     | 10cm-recall  |
|------------|-------------|--------------|--------------|
| CNN-S      | <b>2.35</b> | <b>10.12</b> | <b>0.972</b> |
| CNN        | 5.73        | 18.03        | 0.917        |
| CO[3]      | 5.95        | 14.18        | 0.858        |
| RF[8]      | 17.36       | 86.76        | 0.539        |
| BIM[4]     | 30.58       | 70.02        | 0.300        |
| Möbius[6]  | 26.92       | 79.43        | 0.435        |
| ENC[9]     | 29.29       | 57.28        | 0.303        |
| C2FSym[12] | 25.89       | 96.46        | 0.359        |
| EM[11]     | 31.25       | 90.74        | 0.235        |
| C2F[10]    | 25.51       | 90.62        | 0.277        |
| GMDS[2]    | 35.06       | 91.21        | 0.188        |
| SM[7]      | 32.66       | 75.38        | 0.240        |

(b) Accuracy on inter-subject pairs

Table 1: Evaluation on the FAUST dataset. CNN is the result obtained by performing nearest neighbor search on descriptors produced by our network. CNN-S is the result after non-rigid registration. Data for algorithms other than ours are provided by Chen et al. [3]. Left: Results for intra-subject pairs. Right: Results for inter-subject pairs. For each method we report the average error on all pairs (AE, in centimeters), the worst average error among all pairs (worst AE), and the fraction of correspondences that are within 10 centimeters of the ground truth (10cm-recall).
